# Supplementary material for: Performance Evaluation of Developed Bangasure™ Multiplex rRT-PCR Assay for SARS-CoV-2 Detection in Bangladesh: A Blinded Observational Study at Two Different Sites
Source: MDPI journal article supplement (doi:10.3390/diagnostics12112617), 2022-10-28
Supplement: s1 [file s1]

**Supplementary Table S1:** Accelerated stability estimation of the Bangasure™ kit in 5-weeks' time period.

| If kit is stable at 4±2°C | Then predicted shelf life at freezer temperature (-20°C±5°C)* |
|---------------------------|---------------------------------------------------------------|
| Week 1                    | 1 months                                                      |
| Week 2                    | 2 months                                                      |
| Week3                     | 3 months                                                      |
| Week 4                    | 4 months                                                      |
| Week 5                    | 5 months                                                      |

\*Accelerated stability testing was done according to the following formula derived from the Arrhenius equation; Predicted stability= Accelerated stability x 2<sup>ΔT</sup>/10. Here, ΔT is the difference between the normal storage temperature and the sample storage temperature.

**Supplementary Table S2:** Raw Ct value of individual gene *at site 1 and site 2*

| Site 1  |              |        |        |          |         |             |        |          |          |        |        |        |          |
|---------|--------------|--------|--------|----------|---------|-------------|--------|----------|----------|--------|--------|--------|----------|
| SL. NO. | In house Kit |        |        |          | Sansure |             |        |          | One copy |        |        |        |          |
|         | E gene       | N gene | Rnasep | Result   | N gene  | ORF1ab Gene | Rnasep | Result   | E gene   | N Gene | RdRP   | IC     | Result   |
| 1       | 22.844       | 23.422 | 23.821 | Positive | 23.319  | 24.139      | 24.368 | Positive | 24.758   | 24.143 | 23.787 | 23.706 | Positive |
| 2       | 30.430       | 30.996 | 23.942 | Positive | 30.145  | 31.804      | 24.445 | Positive | 32.129   | 32.050 | 32.036 | 24.888 | Positive |
| 3       | 25.902       | 26.282 | 23.695 | Positive | 25.871  | 26.705      | 23.934 | Positive | 27.744   | 27.381 | 27.245 | 24.595 | Positive |
| 4       | 21.826       | 21.993 | 21.763 | Positive | 21.777  | 22.787      | 22.179 | Positive | 24.235   | 25.956 | 23.312 | 22.953 | Positive |
| 5       | 30.355       | 30.963 | 22.645 | Positive | 30.553  | 31.697      | 23.119 | Positive | 32.862   | 32.128 | 32.179 | 24.357 | Positive |
| 6       | 30.379       | 30.952 | 25.593 | Positive | 30.215  | 31.746      | 25.871 | Positive | 32.201   | 31.068 | 31.992 | 25.735 | Positive |
| 7       | 12.455       | 12.368 | 23.106 | Positive | 12.337  | 14.529      | 20.533 | Positive | 15.138   | 13.353 | 15.322 | 21.274 | Positive |
| 8       | 14.409       | 14.780 | 22.716 | Positive | 13.955  | 15.679      | 20.932 | Positive | 16.388   | 15.311 | 14.358 | 20.574 | Positive |
| 9       | 23.303       | 23.470 | 24.789 | Positive | 23.326  | 25.637      | 25.337 | Positive | 26.186   | 24.447 | 26.105 | 24.889 | Positive |
| 10      | 21.375       | 21.631 | 24.150 | Positive | 20.927  | 22.117      | 24.122 | Positive | 22.412   | 21.058 | 21.744 | 23.077 | Positive |
| 11      | 21.206       | 21.499 | 21.634 | Positive | 21.070  | 22.417      | 21.510 | Positive | 23.009   | 21.902 | 22.853 | 20.723 | Positive |
| 12      | 19.332       | 19.673 | 24.320 | Positive | 19.325  | 20.543      | 23.875 | Positive | 21.110   | 19.998 | 20.685 | 23.863 | Positive |

|    |        |        |        |          |        |        |        |          |        |        |        |        |          |
|----|--------|--------|--------|----------|--------|--------|--------|----------|--------|--------|--------|--------|----------|
| 13 | 18.281 | 18.696 | 23.550 | Positive | 17.984 | 19.477 | 22.964 | Positive | 19.899 | 18.851 | 20.261 | 22.847 | Positive |
| 14 | 17.364 | 17.830 | 27.007 | Positive | 17.927 | 19.080 | 25.253 | Positive | 19.985 | 18.811 | 18.747 | 24.544 | Positive |
| 15 | 30.473 | 30.752 | 24.843 | Positive | 29.924 | 31.917 | 24.412 | Positive | 33.276 | 31.638 | 33.377 | 24.909 | Positive |
| 16 | 22.816 | 23.224 | 25.135 | Positive | 22.915 | 24.387 | 25.471 | Positive | 24.369 | 23.432 | 23.963 | 25.184 | Positive |
| 17 | 25.567 | 25.750 | 23.334 | Positive | 25.404 | 27.202 | 23.777 | Positive | 27.587 | 26.233 | 27.118 | 23.249 | Positive |
| 18 | 27.789 | 28.180 | 24.076 | Positive | 27.803 | 29.605 | 24.326 | Positive | 29.207 | 28.219 | 29.086 | 23.114 | Positive |
| 19 | 25.318 | 25.556 | 20.234 | Positive | 25.189 | 26.732 | 20.670 | Positive | 27.035 | 25.973 | 26.376 | 19.487 | Positive |
| 20 | 27.178 | 27.511 | 25.364 | Positive | 27.040 | 29.301 | 25.754 | Positive | 28.957 | 27.986 | 28.749 | 24.954 | Positive |
| 21 | 32.187 | 32.182 | 25.381 | Positive | 31.858 | 33.960 | 26.569 | Positive | 35.259 | 33.252 | 37.595 | 28.660 | Positive |
| 22 | 22.441 | 22.971 | 25.326 | Positive | 22.445 | 24.147 | 26.510 | Positive | 25.914 | 23.855 | 28.240 | 28.857 | Positive |
| 23 | 25.444 | 25.995 | 23.212 | Positive | 25.361 | 26.666 | 24.092 | Positive | 28.700 | 26.733 | 30.745 | 27.223 | Positive |
| 24 | 24.267 | 24.634 | 23.062 | Positive | 24.021 | 26.297 | 24.050 | Positive | 27.801 | 25.243 | 30.073 | 26.144 | Positive |
| 25 | 20.630 | 20.960 | 23.718 | Positive | 20.149 | 21.871 | 24.734 | Positive | 23.973 | 21.928 | 26.105 | 26.337 | Positive |
| 26 | 17.927 | 18.506 | 24.426 | Positive | 17.941 | 19.347 | 25.184 | Positive | 21.013 | 18.730 | 22.857 | 26.985 | Positive |
| 27 | 18.498 | 19.256 | 23.384 | Positive | 18.700 | 20.865 | 24.720 | Positive | 22.055 | 20.019 | 23.885 | 25.548 | Positive |
| 28 | 21.766 | 22.659 | 25.242 | Positive | 21.569 | 22.542 | 25.708 | Positive | 24.930 | 23.289 | 26.575 | 28.308 | Positive |
| 29 | 19.143 | 19.733 | 24.327 | Positive | 19.202 | 20.427 | 25.219 | Positive | 22.263 | 20.375 | 24.375 | 27.591 | Positive |
| 30 | 12.843 | 13.592 | 23.294 | Positive | 13.370 | 14.206 | 24.373 | Positive | 15.817 | 13.967 | 17.562 | 24.220 | Positive |
| 31 | 27.210 | 28.199 | 25.387 | Positive | 27.317 | 28.537 | 26.156 | Positive | 30.366 | 28.792 | 32.659 | 29.162 | Positive |
| 32 | 27.467 | 27.889 | 24.967 | Positive | 27.138 | 28.862 | 25.647 | Positive | 30.279 | 28.403 | 32.359 | 28.892 | Positive |
| 33 | 24.940 | 25.690 | 22.437 | Positive | 25.226 | 26.395 | 23.485 | Positive | 27.964 | 26.038 | 29.720 | 26.395 | Positive |
| 34 | 27.418 | 27.578 | 26.627 | Positive | 26.559 | 28.017 | 27.059 | Positive | 30.781 | 28.121 | 32.200 | 30.817 | Positive |
| 35 | 24.519 | 24.202 | 23.928 | Positive | 23.568 | 26.327 | 24.707 | Positive | 27.911 | 24.644 | 29.888 | 25.517 | Positive |
| 36 | 27.771 | 27.910 | 26.510 | Positive | 27.388 | 29.493 | 27.490 | Positive | 30.779 | 28.138 | 32.519 | 30.993 | Positive |
| 37 | 23.082 | 23.130 | 21.873 | Positive | 22.070 | 24.452 | 22.845 | Positive | 26.252 | 23.809 | 28.633 | 24.426 | Positive |
| 38 | 35.564 | 36.525 | 25.136 | Positive | 36.370 | 35.091 | 25.806 | Positive | 37.760 | 36.214 | 38.455 | 27.856 | Positive |
| 39 | 34.253 | 34.361 | 26.107 | Positive | 34.957 | 34.650 | 27.095 | Positive | 35.926 | 34.465 | 38.349 | 28.033 | Positive |
| 40 | 31.014 | 31.939 | 25.936 | Positive | 31.030 | 30.996 | 26.548 | Positive | 34.024 | 32.545 | 35.682 | 29.986 | Positive |

|    |        |        |        |          |        |        |        |          |        |        |        |        |          |
|----|--------|--------|--------|----------|--------|--------|--------|----------|--------|--------|--------|--------|----------|
| 41 | 33.796 | 35.249 | 27.043 | Positive | 34.618 | 35.603 | 27.771 | Positive | 39.352 | 35.657 | NTD    | 29.976 | Positive |
| 42 | 35.971 | 35.513 | 23.553 | Positive | 34.980 | 36.199 | 24.610 | Positive | NTD    | 37.389 | 38.884 | 26.693 | Positive |
| 43 | 37.046 | 36.036 | 25.693 | Positive | 35.579 | 35.902 | 26.623 | Positive | 37.508 | 35.964 | NTD    | 29.849 | Positive |
| 44 | 35.971 | 36.655 | 25.757 | Positive | 34.144 | 37.393 | 26.571 | Positive | NTD    | 36.891 | NTD    | 29.945 | Positive |
| 45 | 24.672 | 25.443 | 23.146 | Positive | 24.562 | 23.935 | 23.970 | Positive | 27.708 | 25.905 | 29.465 | 27.616 | Positive |
| 46 | 34.644 | 34.662 | 22.740 | Positive | 33.701 | 34.685 | 23.868 | Positive | 38.256 | 35.109 | 38.675 | 25.038 | Positive |
| 47 | 27.268 | 27.750 | 23.840 | Positive | 27.402 | 28.906 | 24.894 | Positive | 30.769 | 28.580 | 33.331 | 27.297 | Positive |
| 48 | 28.016 | 27.869 | 24.591 | Positive | 27.531 | 29.507 | 25.679 | Positive | 31.571 | 28.718 | 33.874 | 28.820 | Positive |
| 49 | 28.447 | 29.095 | 24.692 | Positive | 28.645 | 25.037 | 25.725 | Positive | 32.355 | 30.309 | 34.685 | 28.047 | Positive |
| 50 | 24.268 | 26.642 | 25.529 | Positive | 26.665 | 28.064 | 26.830 | Positive | 29.719 | 27.606 | 31.62  | 27.973 | Positive |
| 51 | NTD    | NTD    | 24.369 | Negative | NTD    | NTD    | 24.108 | Negative | NTD    | NTD    | NTD    | 24.532 | Negative |
| 52 | NTD    | NTD    | 23.986 | Negative | NTD    | NTD    | 23.034 | Negative | NTD    | NTD    | NTD    | 23.947 | Negative |
| 53 | NTD    | NTD    | 22.148 | Negative | NTD    | NTD    | 22.585 | Negative | NTD    | NTD    | NTD    | 23.397 | Negative |
| 54 | NTD    | NTD    | 22.563 | Negative | NTD    | NTD    | 24.084 | Negative | NTD    | NTD    | NTD    | 22.506 | Negative |
| 55 | NTD    | NTD    | 25.520 | Negative | NTD    | NTD    | 26.429 | Negative | NTD    | NTD    | NTD    | 28.580 | Negative |
| 56 | NTD    | NTD    | 27.158 | Negative | NTD    | NTD    | 27.517 | Negative | NTD    | NTD    | NTD    | 29.932 | Negative |
| 57 | NTD    | NTD    | 27.577 | Negative | NTD    | NTD    | 28.207 | Negative | NTD    | NTD    | NTD    | 31.907 | Negative |
| 58 | NTD    | NTD    | 26.823 | Negative | NTD    | NTD    | 27.728 | Negative | NTD    | NTD    | NTD    | 32.028 | Negative |
| 59 | NTD    | NTD    | 31.318 | Negative | NTD    | NTD    | 31.935 | Negative | NTD    | NTD    | NTD    | 34.263 | Negative |
| 60 | NTD    | NTD    | 24.577 | Negative | NTD    | NTD    | 25.673 | Negative | NTD    | NTD    | NTD    | 29.633 | Negative |
| 61 | NTD    | NTD    | 27.353 | Negative | NTD    | NTD    | 28.048 | Negative | NTD    | NTD    | NTD    | 30.125 | Negative |
| 62 | NTD    | NTD    | 25.623 | Negative | NTD    | NTD    | 24.89  | Negative | NTD    | NTD    | NTD    | 25.938 | Negative |
| 63 | NTD    | NTD    | 26.931 | Negative | NTD    | NTD    | 25.87  | Negative | NTD    | NTD    | NTD    | 27.431 | Negative |
| 64 | NTD    | NTD    | 25.339 | Negative | NTD    | NTD    | 25.18  | Negative | NTD    | NTD    | NTD    | 26.322 | Negative |
| 65 | NTD    | NTD    | 27.988 | Negative | NTD    | NTD    | 27.55  | Negative | NTD    | NTD    | NTD    | 28.971 | Negative |
| 66 | NTD    | NTD    | 29.553 | Negative | NTD    | NTD    | 27.94  | Negative | NTD    | NTD    | NTD    | 28.641 | Negative |
| 67 | NTD    | NTD    | 27.216 | Negative | NTD    | NTD    | 26.42  | Negative | NTD    | NTD    | NTD    | 27.235 | Negative |
| 68 | NTD    | NTD    | 25.539 | Negative | NTD    | NTD    | 26.22  | Negative | NTD    | NTD    | NTD    | 28.934 | Negative |

|    |     |     |        |          |     |     |       |          |     |     |     |        |          |
|----|-----|-----|--------|----------|-----|-----|-------|----------|-----|-----|-----|--------|----------|
| 69 | NTD | NTD | 29.427 | Negative | NTD | NTD | 27.67 | Negative | NTD | NTD | NTD | 29.521 | Negative |
| 70 | NTD | NTD | 24.842 | Negative | NTD | NTD | 23.67 | Negative | NTD | NTD | NTD | 25.449 | Negative |
| 71 | NTD | NTD | 27.912 | Negative | NTD | NTD | 27.89 | Negative | NTD | NTD | NTD | 28.377 | Negative |
| 72 | NTD | NTD | 29.173 | Negative | NTD | NTD | 27.94 | Negative | NTD | NTD | NTD | 28.426 | Negative |
| 73 | NTD | NTD | 23.158 | Negative | NTD | NTD | 22.94 | Negative | NTD | NTD | NTD | 24.713 | Negative |
| 74 | NTD | NTD | 30.032 | Negative | NTD | NTD | 28.22 | Negative | NTD | NTD | NTD | 30.428 | Negative |
| 75 | NTD | NTD | 24.568 | Negative | NTD | NTD | 28.82 | Negative | NTD | NTD | NTD | 29.372 | Negative |
| 76 | NTD | NTD | 22.258 | Negative | NTD | NTD | 23.22 | Negative | NTD | NTD | NTD | 25.964 | Negative |
| 77 | NTD | NTD | 24.783 | Negative | NTD | NTD | 23.75 | Negative | NTD | NTD | NTD | 25.931 | Negative |
| 78 | NTD | NTD | 23.883 | Negative | NTD | NTD | 22.84 | Negative | NTD | NTD | NTD | 25.993 | Negative |
| 79 | NTD | NTD | 27.451 | Negative | NTD | NTD | 28.95 | Negative | NTD | NTD | NTD | 29.714 | Negative |
| 80 | NTD | NTD | 25.678 | Negative | NTD | NTD | 24.43 | Negative | NTD | NTD | NTD | 24.084 | Negative |
| 81 | NTD | NTD | 28.298 | Negative | NTD | NTD | 25.29 | Negative | NTD | NTD | NTD | 26.848 | Negative |
| 82 | NTD | NTD | 26.379 | Negative | NTD | NTD | 25.61 | Negative | NTD | NTD | NTD | 27.295 | Negative |
| 83 | NTD | NTD | 29.304 | Negative | NTD | NTD | 27.51 | Negative | NTD | NTD | NTD | 28.013 | Negative |
| 84 | NTD | NTD | 27.448 | Negative | NTD | NTD | 28.29 | Negative | NTD | NTD | NTD | 29.139 | Negative |
| 85 | NTD | NTD | 23.961 | Negative | NTD | NTD | 23.49 | Negative | NTD | NTD | NTD | 24.446 | Negative |
| 86 | NTD | NTD | 24.873 | Negative | NTD | NTD | 22.91 | Negative | NTD | NTD | NTD | 23.439 | Negative |
| 87 | NTD | NTD | 24.284 | Negative | NTD | NTD | 25.23 | Negative | NTD | NTD | NTD | 26.014 | Negative |
| 88 | NTD | NTD | 25.355 | Negative | NTD | NTD | 26.13 | Negative | NTD | NTD | NTD | 27.494 | Negative |
| 89 | NTD | NTD | 26.762 | Negative | NTD | NTD | 26.19 | Negative | NTD | NTD | NTD | 27.028 | Negative |
| 90 | NTD | NTD | 27.294 | Negative | NTD | NTD | 25.99 | Negative | NTD | NTD | NTD | 26.185 | Negative |
| 91 | NTD | NTD | 23.718 | Negative | NTD | NTD | 24.13 | Negative | NTD | NTD | NTD | 25.327 | Negative |
| 92 | NTD | NTD | 29.416 | Negative | NTD | NTD | 28.81 | Negative | NTD | NTD | NTD | 29.192 | Negative |
| 93 | NTD | NTD | 23.555 | Negative | NTD | NTD | 24.03 | Negative | NTD | NTD | NTD | 26.138 | Negative |
| 94 | NTD | NTD | 21.963 | Negative | NTD | NTD | 23.97 | Negative | NTD | NTD | NTD | 25.115 | Negative |
| 95 | NTD | NTD | 24.189 | Negative | NTD | NTD | 25.42 | Negative | NTD | NTD | NTD | 26.547 | Negative |
| 96 | NTD | NTD | 23.019 | Negative | NTD | NTD | 22.29 | Negative | NTD | NTD | NTD | 23.074 | Negative |

|     |     |     |        |          |     |     |       |          |     |     |     |        |          |
|-----|-----|-----|--------|----------|-----|-----|-------|----------|-----|-----|-----|--------|----------|
| 97  | NTD | NTD | 25.328 | Negative | NTD | NTD | 23.72 | Negative | NTD | NTD | NTD | 24.592 | Negative |
| 98  | NTD | NTD | 24.951 | Negative | NTD | NTD | 24.14 | Negative | NTD | NTD | NTD | 26.914 | Negative |
| 99  | NTD | NTD | 27.727 | Negative | NTD | NTD | 25.97 | Negative | NTD | NTD | NTD | 25.702 | Negative |
| 100 | NTD | NTD | 26.219 | Negative | NTD | NTD | 25.61 | Negative | NTD | NTD | NTD | 27.319 | Negative |

**Site 2**

| SI No | In house kit |        |             |          | Sansure_DNA lab result |             |             |          |
|-------|--------------|--------|-------------|----------|------------------------|-------------|-------------|----------|
|       | N2 gene      | E gene | Rnasep gene | Result   | N gene                 | ORF1ab gene | Rnasep gene | Result   |
| 1     | 28.1         | 26.21  | 28.06       | Positive | 23.32                  | 24.14       | 24.37       | Positive |
| 2     | 31.87        | 28.47  | 27.09       | Positive | 30.15                  | 31.8        | 24.45       | Positive |
| 3     | 28.02        | 27.12  | 25.57       | Positive | 25.87                  | 26.71       | 23.93       | Positive |
| 4     | 23.69        | 22.43  | 23.17       | Positive | 21.78                  | 22.79       | 22.18       | Positive |
| 5     | 33.58        | 34.36  | 26.18       | Positive | 30.55                  | 31.7        | 23.12       | Positive |
| 6     | 36.74        | 34.22  | 28.41       | Positive | 30.22                  | 31.75       | 25.87       | Positive |
| 7     | 12.78        | 14.13  | 29.3        | Positive | 12.34                  | 14.53       | 20.53       | Positive |
| 8     | 15.78        | 15.95  | 25.19       | Positive | 13.96                  | 15.68       | 20.93       | Positive |
| 10    | 22.95        | 22.33  | 25.71       | Positive | 20.93                  | 22.12       | 24.12       | Positive |
| 11    | 22.27        | 23.05  | 24.31       | Positive | 21.07                  | 22.42       | 21.51       | Positive |
| 12    | 21.53        | 21.14  | 27.03       | Positive | 19.33                  | 20.54       | 23.88       | Positive |
| 13    | 18.58        | 19.51  | 28.62       | Positive | 17.98                  | 19.48       | 22.96       | Positive |
| 14    | 16.61        | 17.94  | 31.56       | Positive | 17.93                  | 19.08       | 25.25       | Positive |
| 15    | 32.9         | 32.33  | 27.57       | Positive | 29.92                  | 31.92       | 24.41       | Positive |
| 17    | 27.33        | 26.75  | 24.51       | Positive | 25.4                   | 27.2        | 23.78       | Positive |

|    |       |                          |       |          |       |       |       |          |
|----|-------|--------------------------|-------|----------|-------|-------|-------|----------|
| 18 | 30.22 | 28.79                    | 25.32 | Positive | 27.8  | 29.61 | 24.33 | Positive |
| 19 | 26.46 | 26.41                    | 21.55 | Positive | 25.19 | 26.73 | 20.67 | Positive |
| 20 | 29.4  | 29.21                    | 28.73 | Positive | 27.04 | 29.3  | 25.75 | Positive |
| 21 | 33.22 | 33.02                    | 26.51 | Positive | 31.86 | 33.96 | 26.57 | Positive |
| 26 | 13.69 | 16.95                    | 25.01 | Positive | 17.94 | 19.35 | 25.18 | Positive |
| 31 | 27.98 | 28.19                    | 27.92 | Positive | 27.32 | 28.54 | 26.16 | Positive |
| 32 | 27.08 | 28.47                    | 28.47 | Positive | 27.14 | 28.86 | 25.65 | Positive |
| 36 | 28.22 | 28.61                    | 28.73 | Positive | 27.39 | 29.49 | 27.49 | Positive |
| 39 | 36    | 35.05                    | 28.01 | Positive | 34.96 | 34.65 | 27.1  | Positive |
| 40 | 33.51 | 32.51                    | 26.51 | Positive | 31.03 | 31    | 26.55 | Positive |
| 41 | 35.22 | 35.29                    | 28.09 | Positive | 34.62 | 35.6  | 27.77 | Positive |
| 42 | 39.56 | NTD                      | 28.04 | Positive | 34.98 | 36.2  | 24.61 | Positive |
| 43 | 36.02 | 36.51                    | 27.58 | Positive | 35.58 | 35.9  | 26.62 | Positive |
| 44 | 37.47 | 36                       | 27.59 | Positive | 34.14 | 37.39 | 26.57 | Positive |
| 46 | 31.41 | 33.72                    | 25.11 | Positive | 33.7  | 34.69 | 23.87 | Positive |
| 51 | NTD   | NTD                      | 28.62 | Negative | NTD   | NTD   | 27.11 | Negative |
| 52 | 38.85 | NTD(non-sigmoidal curve) | 29.48 | Negative | NTD   | NTD   | 28.03 | Negative |
| 53 | NTD   | NTD                      | 27.7  | Negative | NTD   | NTD   | 28.59 | Negative |
| 54 | NTD   | NTD                      | 22.8  | Negative | NTD   | NTD   | 24.08 | Negative |
| 55 | NTD   | NTD                      | 24.27 | Negative | NTD   | NTD   | 26.43 | Negative |
| 56 | NTD   | NTD                      | 25.21 | Negative | NTD   | NTD   | 27.52 | Negative |
| 57 | 37.85 | NTD(non-sigmoidal curve) | 23.95 | Negative | NTD   | NTD   | 26.21 | Negative |
| 58 | NTD   | NTD                      | 23.14 | Negative | NTD   | NTD   | 27.73 | Negative |
| 59 | NTD   | NTD                      | 23.57 | Negative | NTD   | NTD   | 27.94 | Negative |

|    |       |                          |       |          |     |     |       |          |
|----|-------|--------------------------|-------|----------|-----|-----|-------|----------|
| 60 | 35.47 | NTD(non-sigmoidal curve) | 22.03 | Negative | NTD | NTD | 25.67 | Negative |
| 61 | NTD   | NTD                      | 26.14 | Negative | NTD | NTD | 28.05 | Negative |
| 62 | 37.87 | NTD(non-sigmoidal curve) | 27.62 | Negative | NTD | NTD | 25.89 | Negative |
| 63 | NTD   | NTD                      | 23.9  | Negative | NTD | NTD | 25.87 | Negative |
| 64 | 33.55 | NTD(non-sigmoidal curve) | 29.29 | Negative | NTD | NTD | 27.18 | Negative |
| 65 | NTD   | NTD                      | 24.19 | Negative | NTD | NTD | 25.55 | Negative |
| 66 | NTD   | NTD                      | 27.31 | Negative | NTD | NTD | 26.94 | Negative |

*\*NTD= Not detected*
